# Supplementary material for: Prevention of endometrial cancer through lifestyle Interventions: A systematic review and synthesis
Source: PubMed Central journal article supplement — Gynecol Oncol Rep. 2021 Dec 6;39:100900. doi: 10.1016/j.gore.2021.100900 (PMC9068952; doi:10.1016/j.gore.2021.100900), 2021-12-06
Supplement: mmc1.pdf [file mmc1.pdf]

551 Supplementary Table 1: Database search strategy  
 552

| Database search strategy                                                                                                                                                                                                                                                                                                                    | Number of articles identified |
|---------------------------------------------------------------------------------------------------------------------------------------------------------------------------------------------------------------------------------------------------------------------------------------------------------------------------------------------|-------------------------------|
| <i>Pubmed</i><br>("endometrial cancer" OR "endometrial hyperplasia" OR "endometrial neoplasm*" OR "uterine cancer" OR "cancer of the uterus" OR "cancer of the endometrium") AND ("reduce risk" OR "prevent*" OR "risk reduc*") AND (interven* OR program* OR lifestyle OR "health intervention" OR behaviour change" OR treat* OR therap*) | 549                           |
| <i>Embase</i><br>"endometrium cancer" AND (prevention OR "risk reduction") AND (intervention OR 'lifestyle modification' OR 'behaviour change')                                                                                                                                                                                             | 87                            |
| <i>Web of Science</i><br>('endometrial cancer' OR 'cancer of the uterus' OR 'uterine cancer' AND (prevent* OR 'reduce risk' OR 'risk reduction' AND intervention OR lifestyle OR 'behaviour change'))                                                                                                                                       | 277                           |
| Total articles identified from database search N = 913                                                                                                                                                                                                                                                                                      |                               |
| Total articles with duplicates removed N = 593                                                                                                                                                                                                                                                                                              |                               |

553 NB: Search strategies included only articles published in the English language between 2010 and 2021  
 554  
 555  
 556  
 557
